# Supplementary material for: Acinetobacter tandoii ZM06 Assists Glutamicibacter nicotianae ZM05 in Resisting Cadmium Pressure to Preserve Dipropyl Phthalate Biodegradation
Source: MDPI journal article supplement (doi:10.3390/microorganisms9071417), 2021-06-30
Supplement: s1 [file s1]

**Table S1** Primers used for quantitative PCR.

| Name           | Sequence (5'-3')      |
|----------------|-----------------------|
| <i>estG</i> FP | CTTTTGTCTCCAGGCTCC    |
| <i>estG</i> RP | GCGCGAGGCGATATTCAAAGC |
| <i>xcpR</i> FP | GCGATAGCAGGGACTAATGC  |
| <i>xcpR</i> RP | TCTGCTGAAGGCACATCAAG  |

**Table S2** The information for the transcriptomic sample.

| Nam | Detailed description                                                                | Sampling time |
|-----|-------------------------------------------------------------------------------------|---------------|
| CK  | Mono-culture of ZM05 with DPrP as the sole carbon source                            | 18h           |
| CD  | Mono-culture of ZM05 with DPrP as the sole carbon source under Cd (II) stress       | 48 h          |
| CO  | Coculture of ZM05 and ZM06 with DPrP as the sole carbon source under Cd (II) stress | 48 h          |

**Table S3** Gene involved in the stress response of strain ZM05 annotated by KEGG

database

| <b>Gene</b>      | <b>Gene annotation</b>             | <b>CD vs. CK</b> | <b>CO vs. CD</b> |
|------------------|------------------------------------|------------------|------------------|
| <i>cspA</i>      | cold shock protein                 | 2.03             | -                |
| <i>trxB, TRR</i> | thioredoxin reductase (NADPH)      | 2.1              | -                |
| <i>ribH</i>      | Riboflavin synthase, alpha subunit | 2.62             | -                |
| <i>ribE</i>      | Riboflavin synthase, alpha subunit | 2.36             | -                |

“-” means no significant change.

**Table S4** Degradation gene of strain ZM05 annotated by KEGG database

| <b>Gene</b>   | <b>Gene annotation</b>                         | <b>CD vs. CK</b> | <b>CO vs. CD</b> |
|---------------|------------------------------------------------|------------------|------------------|
| <i>catE</i>   | catechol 2,3-dioxygenase                       | -1.16            | 1.09             |
| <i>catA</i>   | catechol 1,2-dioxygenase                       | -2.65            | 2.02             |
| <i>yvaK</i>   | carboxylesterase                               | -0.01            | 0.05             |
| <i>K06999</i> | carboxylesterase                               | -2.83            | 1.31             |
| <i>pcaC</i>   | 4-carboxymuconolactone decarboxylase           | 3.63             | -1.90            |
| <i>pcaD</i>   | 3-oxoadipate enol-lactonase                    | 3.36             | -1.31            |
| <i>pcaB</i>   | 3-carboxy-cis,cis-muconate cycloisomerase      | 3.17             | -0.79            |
| <i>pcaG</i>   | protocatechuate 3,4-dioxygenase, alpha subunit | 4.78             | -0.72            |
| <i>pcaH</i>   | protocatechuate 3,4-dioxygenase, beta subunit  | 4.93             | -0.67            |
| <i>pobA</i>   | p-hydroxybenzoate 3-monooxygenase              | 4.75             | -1.89            |
| <i>pcaI</i>   | 3-oxoadipate CoA-transferase                   | 2.94             | -3.08            |
| <i>pcaJ</i>   | pca regulon regulatory protein                 | 3.14             | -3.44            |
| <i>pcaR</i>   | pca regulon regulatory protein                 | 2.52             | -2.61            |

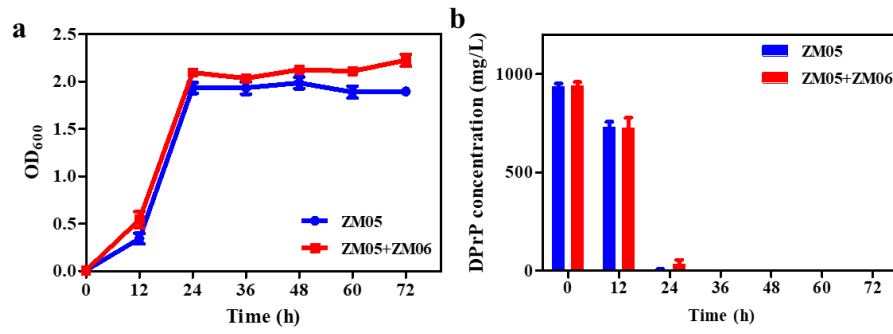

**Fig. S1.** Growth curve (a) and DPrP degradation behavior (b) in monoculture and coculture under optimum conditions. All data are presented as the mean  $\pm$  SE. The blue line (column) represents the monoculture of strain ZM05; the red line (column) represents the coculture of strains ZM05 and ZM06. \*\*\* $p < 0.001$ , \*\* $p < 0.01$ , \* $p < 0.05$ .

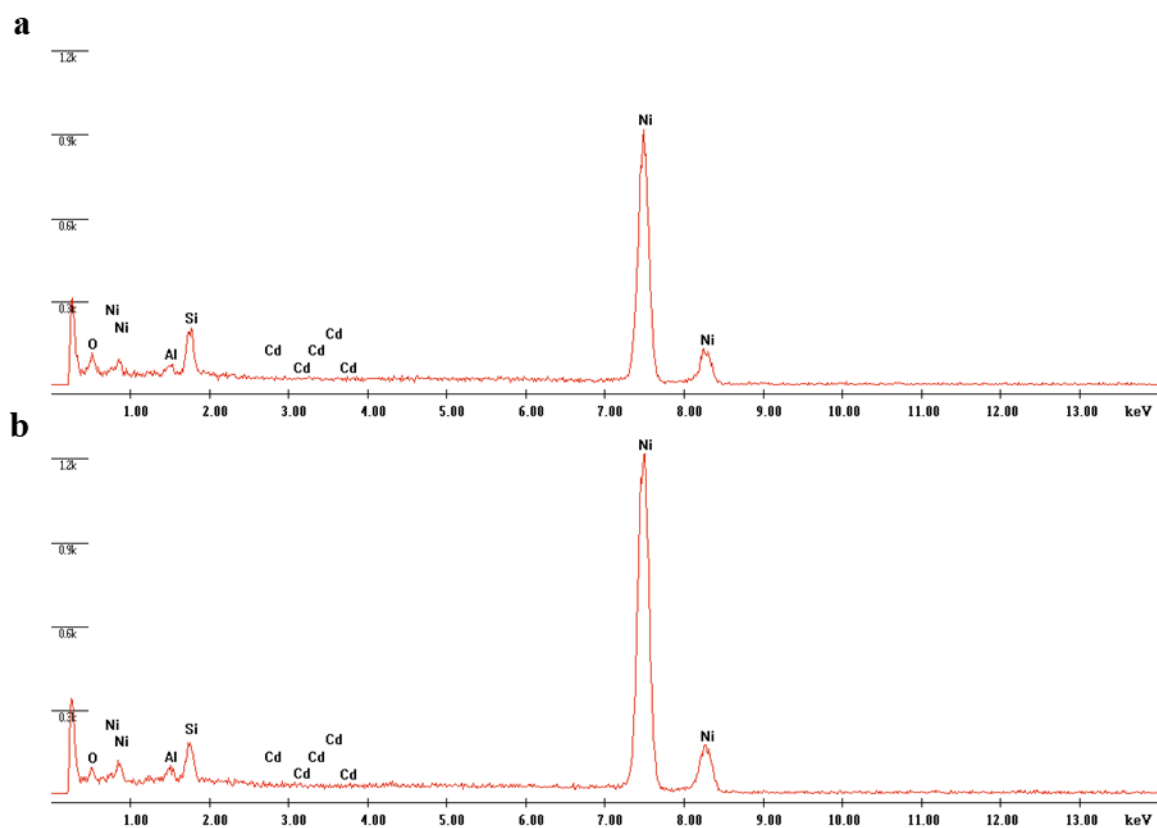

**Fig.S2.** Energy dispersive spectrum (EDS) analysis of strain ZM05 (a) and ZM06 (b) under Cd (II) stress.

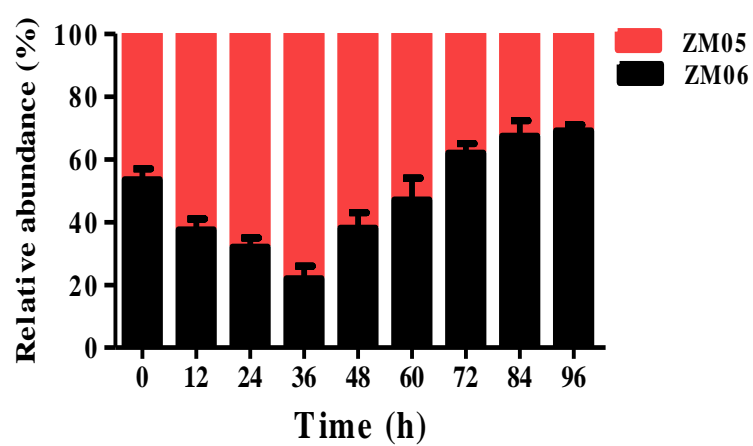

**Fig.S3.** Relative abundances of strain ZM05 and strain ZM06 in coculture system under Cd (II) stress. All data are presented as the mean  $\pm$  SE.

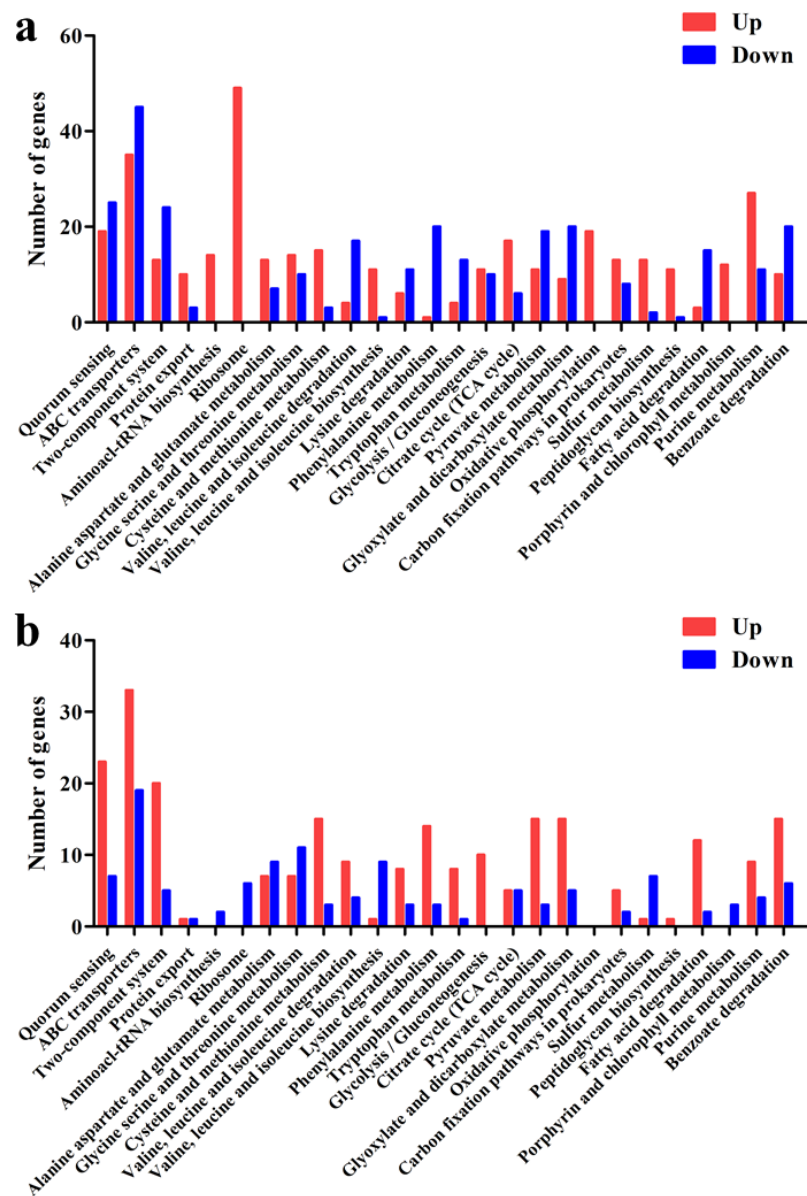

**Fig. S4.** Metabolism pathway (KEGG) analyses of DEGs from strain ZM05 with or without Cd (II) stress (a) and strain ZM05 in mono-culture system or coculture system under Cd (II) stress (b).
